# Supplementary material for: Inhibition of non-small cell lung cancer (NSCLC) proliferation through targeting G6PD
Source: PeerJ journal article supplement (doi:10.7717/peerj.16503), 2023-12-05
Supplement: Raw_data.xlsx [file Raw_data.xlsx]

## Sheet: Index
Supplemental file raw data	Inhibition of non-small cell lung cancer (NSCLC) proliferation through targeting G6PD
Column	Explaination
Patient No.
Age
Gender	1=Male, 2=Female
Subtypes	1=Addeno, 2=Squamous, 3=Small
Types	1=NSCLC, 2=SCLC
Tumor Size	999=No data
Lymph Node Metastasis	1=No, 2=Yes, 999=No data
Distant Metastasis	1=No, 2=Yes, 999=No data
TNM stage	1=early, 2=late
G6PD	1=negative, 2=positive
Hscore	999=No data
Recurrent	1=No, 2=Yes, 999=No data
Death	1=No, 2=Yes, 999=No data
Cells	1=H1975, 2=H292, 3=Beas-2B
Condition (G6PD activity)	1=Vehicle, 2=DHEA200uM, 3=DHEA300uM, 4=DHEA400uM
Condition (Proliferation)	1=Vehicle, 2=DHEA300uM, 3=scramble, 4=siG6PD
Condition (Colony)	1=Vehicle, 2=DHEA300uM
Condition (G6PD mRNA)	3=scramble, 4=siG6PD
Condition (Wound confluence)	1=Vehicle, 2=DHEA300uM, 3=scramble, 4=siG6PD
Time (Wound confluence)	0=0h, 2=2h, 4=4h, 6=6h, 8=8h, 10=10h, 12=12h, 24=24h
Condition (Bax/Bcl-2)	1=Vehicle, 2=DHEA300uM, 3=scramble, 4=siG6PD
Condition (Ribose)	1=Vehicle, 2=DHEA300uM, 3=DHEA300uM+100uMRibose, 4=DHEA300uM+1000uMRibose, 5=scramble, 6=siG6PD100nM, 7=siG6PD100nM+2000uMRibose, 8=siG6PD100nM+4000uMRibose

## Sheet: Characteristic
Patient No.	Age	Gender (1=Male, 2=Female)	Subtypes (1=Addeno, 2=Squamous, 3=Small)	Types (1=NSCLC, 2=SCLC)	TumorSize (999=No data)	LymphNodeMetastasis (1=No, 2=Yes, 999=No data)	DistantMetastasis (1=No, 2=Yes, 999=No data)	TNMstage (1=early, 2=late)	G6PD (1=negative, 2=positive)	Hscore (999=No data)	Recurrent (1=No, 2=Yes, 999=No data)	Death (1=No, 2=Yes, 999=NoData)
1	30	1	2	1	14	1	2	2	2	95.5	2	999
2	43	2	1	1	2.1	2	2	2	2	25.1	999	999
3	43	2	1	1	3.1	2	1	2	2	85.6	999	999
4	49	2	1	1	2.3	1	1	1	2	34.5	999	999
5	50	2	3	2	5	2	2	2	1	999	1	2
6	51	1	2	1	5	2	1	1	2	76.7	1	999
7	52	1	3	2	7.7	2	2	2	1	999	1	999
8	52	1	3	2	15	2	2	2	1	999	999	2
9	54	2	3	2	999	999	999	999	1	999	1	999
10	56	1	3	2	2.5	2	2	2	2	25	1	999
11	56	2	1	1	2.8	1	1	1	2	31.9	999	999
12	56	2	1	1	1.9	1	2	1	1	999	2	1
13	56	1	1	1	2	1	2	1	2	4.8	2	999
14	60	1	1	1	4	1	2	1	1	999	999	999
15	62	1	3	2	999	2	2	2	1	999	2	999
16	64	1	2	1	4.7	2	1	2	1	999	999	999
17	64	1	3	2	4.7	999	2	2	1	999	999	999
18	66	1	1	1	2.8	1	1	1	2	78.5	1	999
19	66	1	2	1	5.9	2	1	2	1	999	1	999
20	66	2	1	1	2	1	1	1	1	999	999	1
21	66	2	1	1	3	2	999	999	2	23.5	999	1
22	67	1	3	2	5.1	2	2	2	1	999	1	999
23	67	1	1	1	2.3	2	2	2	2	26.8	999	999
24	68	2	1	1	4	1	1	1	2	31.4	1	1
25	68	2	1	1	2.5	2	2	2	2	11.2	2	1
26	70	1	3	2	1.6	2	2	2	1	999	1	2
27	70	1	3	2	4	2	2	2	1	999	1	999
28	70	1	2	1	5.4	1	2	2	2	57.8	1	1
29	70	1	2	1	5	1	1	1	1	999	2	999
30	71	2	1	1	3	1	1	1	2	9.1	1	1
31	71	1	1	1	6.7	2	2	2	2	16.3	999	1
32	71	2	1	1	2	1	1	1	2	5.9	2	999
33	71	1	3	2	8.6	2	1	2	1	999	2	999
34	72	2	3	2	3.8	2	2	2	1	999	1	2
35	72	1	1	1	3	1	1	1	2	23.2	2	2
36	72	1	1	1	3	2	2	1	2	17	2	2
37	73	2	1	1	4	1	1	1	2	73.7	1	1
38	73	1	3	2	6.8	2	1	2	1	999	2	999
39	74	1	2	1	2.8	1	1	1	2	78.5	1	1
40	74	1	3	2	10	2	2	2	1	999	1	2
41	75	2	1	1	1.5	1	1	1	2	46	1	1
42	75	1	2	1	2.5	1	999	999	2	118.4	999	999
43	75	2	3	2	5	2	1	2	2	26.6	999	999
44	76	2	1	1	4	2	2	1	2	58.2	2	999
45	77	1	3	2	7.3	2	2	2	1	999	1	999
46	77	2	1	1	4	2	1	2	2	23.4	999	999
47	77	1	1	1	6	1	1	1	1	999	999	999
48	78	1	3	2	8	2	2	2	1	999	999	1
49	78	1	3	2	3.5	2	2	2	1	999	2	999
50	78	1	2	1	3.8	1	1	1	2	73	2	999
51	79	1	2	1	3	1	1	1	2	10	1	999
52	79	1	2	1	7.5	2	1	2	2	15.6	1	2
53	81	2	1	1	2.5	2	2	2	2	4	1	1
54	81	2	1	1	4	1	1	1	2	7.8	1	1
55	81	2	1	1	4	2	2	2	2	16.7	2	2
56	81	2	1	1	5	1	1	1	2	32	2	1
57	82	2	2	1	6.3	2	1	2	2	90	1	999
58	84	1	3	2	8.2	2	2	2	1	999	1	2
59	85	1	3	2	6	1	1	1	1	999	999	999
60	86	1	1	1	3	1	1	1	2	40	1	999
61	86	1	2	1	5.7	1	1	2	2	4.1	1	1
62	88	1	2	1	3.5	1	1	1	2	45	1	2
63	89	1	2	1	4.5	1	1	1	2	102.1	2	999
64	94	1	2	1	5.2	1	2	1	1	999	1	2

## Sheet: Baseline
Cells (1= H1975, 2=H292, 3=Beas-2B)	Proliferation_%change	G6PDmRNA_foldchange	G6PDActivity_%change
1	54.9471	0.048061	35.7009
1	56.9225	0.031182	29.721
1	55.7269		25.8575
1	42.8868
1	53.8555
1	54.5833
1	46.4737
1	55.9868
1	56.9745
1	35.1932
1	57.6503
1	54.6352
1	52.296
1	57.0265
1	56.7146
1	54.0114
1	56.7666
1	43.3027
1	55.2591
1	56.5587
1	56.0388
1	57.8063
1	69.9186
1	53.3876
1	60.8213
1	63.5245
1	54.2194
1	58.2221
1	53.1797
1	60.6654
2	91.336	1.04924	91.2496
2	107.607	0.953068	110.796
2	110.362		100.232
2	89.2566
2	108.335
2	102.461
2	101.785
2	105.684
2	88.6848
2	90.1404
2	103.084
2	102.305
2	92.9475
2	99.8614
2	105.528
2	98.3019
2	103.864
2	102.928
2	97.886
2	105.944
2	103.396
2	86.0856
2	105.32
2	102.98
2	96.7423
2	98.4058
2	99.4975
2	104.54
2	101.837
2	92.8955
3	81.563	0.350171	14.5218
3	81.615	0.201809	24.3961
3	81.8229		20.11
3	81.9269
3	77.0404
3	66.7995
3	74.0253
3	75.117
3	63.6805
3	67.4233
3	64.8761
3	66.0198
3	66.3317
3	66.6955
3	67.3194
3	82.1868
3	70.2305
3	71.1662
3	66.2797
3	64.5642
3	66.0717
3	63.2126
3	63.6285
3	64.7202
3	81.0951
3	83.6943
3	86.9173
3	85.6177
3	84.4221
3	87.7491

## Sheet: G6PDActivity
Cells (1=H1975, 2=H292)	Condition (1=Vehicle, 2=DHEA200uM, 3=DHEA300uM, 4=DHEA400uM)	Activity
1	1	112.5
1	1	112.5
1	1	103.85
1	1	112.5
1	1	95.19
1	1	95.19
1	2	107.14
1	2	107.14
1	2	116.07
1	3	27.86
1	3	27.86
1	3	25.32
1	4	-21.43
1	4	-25.32
1	4	-25.32
2	1	83.51
2	1	92.78
2	1	92.78
2	1	92.78
2	1	119.07
2	1	119.07
2	2	100
2	2	75.83
2	2	94.79
2	3	50.34
2	3	49.55
2	3	38.61
1	4	17.19
1	4	18.68
1	4	18.68

## Sheet: Proliferation
Cells (1=H1975, 2=H292)	Condition (1=Vehicle, 2=DHEA300uM, 3=scramble, 4=siG6PD)	proliferation
1	2	10.74
1	2	14.27
1	2	20.03
1	2	22.61
1	2	25.2
1	2	35.38
1	1	86.25
1	1	86.72
1	1	98.26
1	1	106.87
1	1	106.87
1	1	115.01
2	1	98.8
2	1	80.53
2	1	78.56
2	1	75.16
2	1	100.63
2	1	68.21
2	2	53.35
2	2	51.09
2	2	56.07
2	2	53.35
2	2	51.09
2	2	56.07
1	3	99.66
1	3	116.43
1	3	110.25
1	3	113.99
1	3	114.38
1	3	119.13
1	3	103.12
1	3	115.95
1	3	114.38
1	4	74.42
1	4	86.47
1	4	71.81
1	4	77.35
1	4	78.33
1	4	79.47
1	4	64.97
1	4	90.05
1	4	72.63
2	3	94.5
2	3	100.72
2	3	103.59
2	3	109.57
2	3	102.75
2	3	107.54
2	3	111.72
2	3	104.67
2	3	103.35
2	4	74.4
2	4	72.49
2	4	82.3
2	4	68.54
2	4	72.43
2	4	85.32
2	4	91.83
2	4	85.32
2	4	86.81

## Sheet: Colony
Cells (1=H1975, 2=H292)	Condition (1=Vehicle, 2=DHEA300uM)	colony forming rate (%)
1	1	102.344
1	1	97.2656
1	1	100.391
1	2	0
1	2	0
1	2	0
2	1	100
2	1	105.039
2	1	94.9612
2	2	0
2	2	0
2	2	0

## Sheet: G6PDmRNA
Cells (1=H1975, 2=H292)	Condition (3=scramble, 4=siG6PD)	G6PDmRNA
1	3	0.89
1	3	1.12
1	3	0.89
1	3	1.12
1	4	0.02
1	4	0.02
1	4	0.02
1	4	0.02
2	3	1.13
2	3	0.88
2	3	1.15
2	3	0.87
2	4	0.63
2	4	0.26
2	4	0.9
2	4	0.26

## Sheet: Wound confluence
Cells (1=H1975, 2=H292)	Condition (1=Vehicle, 2=DHEA300uM, 3=scramble, 4=siG6PD)	time (0=0h, 2=2h, 4=4h, 6=6h, 8=8h, 10=10h, 12=12h, 24=24h)	wound
1	2	0	0
1	2	0	0
1	2	0	0
1	2	2	10.05
1	2	2	1.87
1	2	2	3.85
1	2	4	16.52
1	2	4	2.67
1	2	4	5.13
1	2	6	17.63
1	2	6	5.33
1	2	6	7.44
1	2	8	24.55
1	2	8	17.33
1	2	8	10.26
1	2	10	29.69
1	2	10	23.73
1	2	10	18.46
1	2	12	31.25
1	2	12	24
1	2	12	21.02
1	2	24	34.82
1	2	24	24.27
1	2	24	26.15
1	1	0	0
1	1	0	0
1	1	0	0
1	1	2	13.79
1	1	2	20.17
1	1	2	11.85
1	1	4	26.44
1	1	4	30.97
1	1	4	33.33
1	1	6	33.05
1	1	6	37.5
1	1	6	37.74
1	1	8	46.26
1	1	8	44.03
1	1	8	51.24
1	1	10	56.32
1	1	10	54.26
1	1	10	58.13
1	1	12	75.29
1	1	12	75.85
1	1	12	74.93
1	1	24	97.13
1	1	24	97.44
1	1	24	97.8
2	2	0	0
2	2	0	0
2	2	0	0
2	2	2	1.63
2	2	2	6.23
2	2	2	3.2
2	2	4	8.42
2	2	4	12.21
2	2	4	7.73
2	2	6	14.4
2	2	6	16.62
2	2	6	11.73
2	2	8	22.28
2	2	8	20.26
2	2	8	14.67
2	2	10	23.37
2	2	10	21.3
2	2	10	16.8
2	2	12	22.83
2	2	12	22.08
2	2	12	17.33
2	2	24	27.45
2	2	24	24.93
2	2	24	25.6
2	1	0	0
2	1	0	0
2	1	0	0
2	1	2	18.55
2	1	2	13.93
2	1	2	23.86
2	1	4	31.59
2	1	4	32.82
2	1	4	28.43
2	1	6	34.2
2	1	6	35.91
2	1	6	34.97
2	1	8	39.71
2	1	8	39.01
2	1	8	38.24
2	1	10	44.35
2	1	10	43.65
2	1	10	42.16
2	1	12	49.57
2	1	12	45.82
2	1	12	44.12
2	1	24	68.99
2	1	24	69.97
2	1	24	75.49
1	3	0	0
1	3	0	0
1	3	0	0
1	4	0	0
1	4	0	0
1	4	0	0
1	3	2	2.49
1	3	2	1.88
1	3	2	7.1
1	4	2	4.45
1	4	2	-4.31
1	4	2	-0.27
1	3	4	3.05
1	3	4	3.69
1	3	4	9.18
1	4	4	5.86
1	4	4	8.27
1	4	4	1.98
1	3	6	10.43
1	3	6	11.83
1	3	6	13.76
1	4	6	11.3
1	4	6	4.74
1	4	6	3.28
1	3	8	19.42
1	3	8	19.97
1	3	8	13.05
1	4	8	16.1
1	4	8	-3.11
1	4	8	21.27
1	3	10	23.92
1	3	10	26.98
1	3	10	16.99
1	4	10	17.37
1	4	10	17.26
1	4	10	19.97
1	3	12	21.99
1	3	12	8.82
1	3	12	24.73
1	4	12	19.7
1	4	12	21.85
1	4	12	28.86
1	3	24	60.27
1	3	24	64.28
1	3	24	66.02
1	4	24	62.01
1	4	24	67.82
1	4	24	63.2
2	3	0	0
2	3	0	0
2	3	0	0
2	4	0	0
2	4	0	0
2	4	0	0
2	3	2	5.98
2	3	2	10.35
2	3	2	1.47
2	4	2	2.92
2	4	2	7.51
2	4	2	1.21
2	3	4	14.7
2	3	4	13.49
2	3	4	9.77
2	4	4	14.04
2	4	4	11.31
2	4	4	4.19
2	3	6	15.2
2	3	6	14.51
2	3	6	19.71
2	4	6	16.23
2	4	6	14.46
2	4	6	7.66
2	3	8	16.11
2	3	8	19.29
2	3	8	18.49
2	4	8	19.16
2	4	8	16.15
2	4	8	12.74
2	3	10	16.28
2	3	10	20.86
2	3	10	24.84
2	4	10	18.91
2	4	10	18.34
2	4	10	17.98
2	3	12	25.41
2	3	12	27.45
2	3	12	16.69
2	4	12	15.02
2	4	12	24.39
2	4	12	22.1
2	3	24	64.95
2	3	24	58.2
2	3	24	53.91
2	4	24	16.23
2	4	24	27.22
2	4	24	27.18

## Sheet: BaxBcl2
Cells (1=H1975, 2=H292)	Condition (1=Vehicle, 2=DHEA300uM, 3=scramble, 4=siG6PD)	Bax/Bcl2 fold change
1	1	0.96
1	1	1.05
1	1	0.9
1	1	1.12
1	2	1.01
1	2	1.01
1	2	1.78
1	2	1.57
1	3	1.45
1	3	0.76
1	3	1.45
1	3	0.76
1	4	1.11
1	4	0.91
1	4	1.11
1	4	0.91
2	1	0.97
2	1	1.03
2	1	0.97
2	1	1.03
2	2	4.28
2	2	3.36
2	2	4.28
2	2	3.36
2	3	0.95
2	3	1.06
2	3	0.82
2	3	1.28
2	4	3.6
2	4	2.74
2	4	2.52
2	4	2.36

## Sheet: Ribose
Cells (1=H1975, 2=H292)	Condition (1=Vehicle, 2=DHEA300uM, 3=DHEA300uM+100uMRibose, 4=DHEA300uM+1000uMRibose, 5=scramble, 6=siG6PD100nM, 7=siG6PD100nM+2000uMRibose, 8=siG6PD100nM+4000uMRibose	Ribose (0=0uM, 100=100uM, 1,000=1,000uM, 2,000=2,000uM, 4,000=4,000uM)	Percent
1	1	0	100.02
1	1	0	101.33
1	1	0	97.77
1	1	0	97.46
1	1	0	97.93
1	1	0	98.13
1	1	0	102.17
1	1	0	97.77
1	1	0	100.95
1	1	0	103.84
1	2	0	67.36
1	2	0	77.86
1	2	0	78.67
1	2	0	81.1
1	2	0	72.2
1	2	0	75.98
1	3	100	73.28
1	3	100	73.01
1	3	100	78.13
1	3	100	78.4
1	3	100	79.48
1	4	1000	72.2
1	4	1000	75.44
1	4	1000	73.01
1	4	1000	75.17
1	4	1000	69.24
1	4	1000	92.14
2	1	0	92.01
2	1	0	104.89
2	1	0	96.71
2	1	0	97.09
2	1	0	108.69
2	1	0	98.68
2	1	0	94.94
2	1	0	110.71
2	1	0	106.86
2	1	0	100.09
2	1	0	110.21
2	1	0	104.16
2	1	0	110.43
2	1	0	110.62
2	1	0	106.07
2	2	0	83.91
2	2	0	82.06
2	2	0	74.54
2	2	0	92.25
2	2	0	81.89
2	2	0	83.87
2	2	0	96.07
2	2	0	90.05
2	2	0	95.19
2	2	0	84.75
2	2	0	84.17
2	2	0	92.62
2	2	0	89.6
2	2	0	89.9
2	2	0	89.9
2	3	100	96.44
2	3	100	111.73
2	3	100	97.03
2	3	100	107.83
2	3	100	98.79
2	3	100	88.58
2	3	100	97.47
2	3	100	108.5
2	3	100	101.29
2	3	100	105.04
2	3	100	98.06
2	3	100	99.68
2	4	1000	101.88
2	4	1000	104.45
2	4	1000	102.17
2	4	1000	103.2
2	4	1000	89.6
2	4	1000	89.09
2	4	1000	104.09
2	4	1000	107.83
2	4	1000	107.83
2	4	1000	102.91
2	4	1000	99.75
1	5	0	99.48
1	5	0	107.73
1	5	0	112.88
1	5	0	103.98
1	5	0	102.43
1	5	0	101.5
1	5	0	105.37
1	5	0	99.87
1	5	0	105.96
1	5	0	104.26
1	5	0	100.83
1	5	0	97.61
1	6	0	80.21
1	6	0	93.97
1	6	0	87.68
1	6	0	93.67
1	6	0	85.29
1	6	0	92.39
1	6	0	92.79
1	6	0	88.07
1	6	0	89
1	6	0	93.52
1	6	0	88.11
1	7	2000	87.68
1	7	2000	93.18
1	7	2000	92.79
1	7	2000	98.75
1	7	2000	84.89
1	8	4000	86.5
1	8	4000	82.18
1	8	4000	92.11
1	8	4000	94.51
1	8	4000	83.28
1	8	4000	97.61
1	8	4000	95.47
2	5	0	93.83
2	5	0	99.12
2	5	0	103.68
2	5	0	98.69
2	5	0	90.86
2	5	0	89.05
2	5	0	100.36
2	5	0	105.97
2	5	0	92.19
2	5	0	102.64
2	5	0	97.36
2	5	0	110.45
2	5	0	100.12
2	5	0	96.2
2	5	0	95.64
2	5	0	103.83
2	5	0	105.16
2	5	0	95.05
2	6	0	77.77
2	6	0	92.65
2	6	0	88.36
2	6	0	88.16
2	6	0	85.15
2	6	0	91.57
2	6	0	83.73
2	6	0	92.7
2	7	2000	89.43
2	7	2000	97.62
2	7	2000	84.8
2	7	2000	91.45
2	7	2000	99.55
2	7	2000	99.2
2	7	2000	95.87
2	7	2000	97.29
2	7	2000	91.48
2	8	4000	109.03
2	8	4000	101.19
2	8	4000	104.19
2	8	4000	104.36
2	8	4000	97.06
2	8	4000	98.01
2	8	4000	101.89
2
2
2
2
2
2
2
2
2
2
2
2
2
2
2
2
2
